# Supplementary material for: A phosphorescent OLED with an efficiency roll-off lower than 1% at 10 000 cd m−2 achieved by reducing the carrier mobility of the donors in an exciplex co-host system
Source: Royal Society of Chemistry journal article supplement (doi:10.1039/d1tc04473g), 2022-01-01
Supplement: d1tc04473g1.pdf [file d1tc04473g1.pdf]

## Supporting Information

# A Phosphorescent OLED with Efficiency Roll-Off Lower than 1% at 10,000 cd/m<sup>2</sup> Achieved by Reducing the Carrier Mobility of the Donors in Exciplex Co-host System

Chun-Hao Chiu<sup>a</sup>, Nurul Ridho Al Amin<sup>b,c,d</sup>, Jia-Xun Xie<sup>a</sup>, Chih-Chien Lee<sup>d</sup>, Dian Luo<sup>c</sup>, Sajal Biring<sup>b,c</sup>, Kevin Sutanto<sup>b,c</sup>, Shun-Wei Liu<sup>b,c,\*</sup>, Chih-Hsin Chen<sup>a,\*</sup>

<sup>a</sup>Department of Chemistry, Tamkang University, New Taipei City 251, Taiwan

<sup>b</sup>Organic Electronics Research Center, Ming Chi University of Technology, New Taipei City 24301, Taiwan

<sup>c</sup>Department of Electronic Engineering, Ming Chi University of Technology, New Taipei City 24301, Taiwan

<sup>d</sup>Department of Electronic Engineering, National Taiwan University of Science and Technology, Taipei 10617, Taiwan

\*Corresponding authors: [chc@mail.tku.edu.tw](mailto:chc@mail.tku.edu.tw) (Chih-Hsin Chen)

[swliu@mail.mcut.edu.tw](mailto:swliu@mail.mcut.edu.tw) (Shun-Wei Liu)

**Table S1.** The decay lifetime of BCzPh-pimi, BCzPh-mimi and their blended films with B3PyMPM.

| sample             | TRPL decay curve    |                     |
|--------------------|---------------------|---------------------|
|                    | T <sub>1</sub> (ns) | T <sub>2</sub> (ns) |
| BCzPh-pimi         | 5.39                | ---                 |
| BCzPh-mimi         | 9.46                | ---                 |
| BCzPh-pimi/B3PyMPM | 63.73               | 274.79              |
| BCzPh-mimi/B3PyMPM | 54.16               | 263.21              |

**Table S2.** The hole mobility of hole only device (HOD) and electron mobility of electron only device (EOD) by SCLC methods.

| sample     | hole mobility (cm <sup>2</sup> V <sup>-1</sup> s <sup>-1</sup> )     | electric field (V cm <sup>-1</sup> ) <sup>1/2</sup> |
|------------|----------------------------------------------------------------------|-----------------------------------------------------|
| BCzPh-pimi | 2.80 x 10 <sup>-6</sup>                                              | 850 - 950                                           |
| BCzPh-mimi | 1.13 x 10 <sup>-6</sup>                                              | 850 - 950                                           |
| BCzPh      | 1.13 x 10 <sup>-5</sup>                                              | 700 - 800                                           |
| sample     | electron mobility (cm <sup>2</sup> V <sup>-1</sup> s <sup>-1</sup> ) | electric field (V cm <sup>-1</sup> ) <sup>1/2</sup> |
| BCzPh-pimi | 1.39 x 10 <sup>-9</sup>                                              | 850 - 950                                           |
| BCzPh-mimi | 5.98 x 10 <sup>-9</sup>                                              | 800 - 900                                           |
| B3PyMPM    | 7.79 x 10 <sup>-6</sup>                                              | 800 - 900                                           |

**Table S3.** Summary of the UV and PL spectra data of BCzPh-pimi and BCzPh-mimi.

| compound   | solvent                           | toluene | DPE  | diethyl ether | DCM   | DMF   | ACN   |
|------------|-----------------------------------|---------|------|---------------|-------|-------|-------|
|            | polarity                          | 0.01    | 0.08 | 0.16          | 0.22  | 0.27  | 0.31  |
| BCzPh-pimi | UV (nm)                           | 338     | 340  | 335           | 334   | 325   | 327   |
|            | PL (nm)                           | 403     | 412  | 403           | 452   | 464   | 476   |
|            | $\nu_a-\nu_f$ (cm <sup>-1</sup> ) | 4894    | 5139 | 5036          | 7816  | 9217  | 9572  |
| BCzPh-mimi | UV (nm)                           | 304     | 305  | 302           | 303   | 302   | 301   |
|            | PL (nm)                           | 404     | 409  | 403           | 458   | 475   | 498   |
|            | $\nu_a-\nu_f$ (cm <sup>-1</sup> ) | 8203    | 8337 | 8298          | 11169 | 12059 | 13142 |

DPE: diphenyl ether; DCM: dichloromethane; DMF: dimethylformamide; ACN: acetonitrile.

**Table S4.** The calculated excited-state dipole moments of BCzPh-pimi and BCzPh-mimi.

| compound   | $\mu_g^a$ (Debye) | excited-state dipole (Debye) |                 |
|------------|-------------------|------------------------------|-----------------|
|            |                   | LE <sup>b</sup>              | CT <sup>c</sup> |
| BCzPh-pimi | 3.46              | 8.15                         | 32.68           |
| BCzPh-mimi | 4.22              | 8.10                         | 33.73           |

<sup>a</sup> $\mu_g$  is calculated by using the DFT method at the B3LYP/6-31G(d) levels. <sup>b</sup>Calculated from the slope of the fitted line in the low-polarity solvents. <sup>c</sup>Calculated from the slope of the fitted line in the high-polarity solvents. The excited-state dipole moment can be calculated from the slope of Lippert–Mataga plot, Stokes shift ( $\nu_a-\nu_f$ ) against the solvent polarizability,  $f$ , according to the Lippert–Mataga equation.<sup>24</sup>

**Table S5.** The hole only device (HOD) hole mobility and electron only device (EOD) electron mobility by SCLC methods.

| sample             | hole mobility ( $\text{cm}^2 \text{V}^{-1} \text{s}^{-1}$ )     | electric field ( $\text{V cm}^{-1}$ ) <sup>1/2</sup> |
|--------------------|-----------------------------------------------------------------|------------------------------------------------------|
| BCzPh-pimi         | $2.80 \times 10^{-6}$                                           | 850 – 950                                            |
| BCzPh-mimi         | $1.13 \times 10^{-6}$                                           | 850 – 950                                            |
| BCzPh              | $1.13 \times 10^{-5}$                                           | 700 – 800                                            |
| BCzPh-pimi:B3PyMPM | $2.79 \times 10^{-9}$                                           | 900 – 1000                                           |
| BCzPh-mimi:B3PyMPM | $7.48 \times 10^{-10}$                                          | 950 – 1050                                           |
| sample             | electron mobility ( $\text{cm}^2 \text{V}^{-1} \text{s}^{-1}$ ) | electric field ( $\text{V cm}^{-1}$ ) <sup>1/2</sup> |
| BCzPh-pimi         | $1.39 \times 10^{-9}$                                           | 850 – 950                                            |
| BCzPh-mimi         | $5.98 \times 10^{-9}$                                           | 800 – 900                                            |
| B3PyMPM            | $7.79 \times 10^{-6}$                                           | 800 – 900                                            |
| BCzPh-pimi:B3PyMPM | $7.45 \times 10^{-8}$                                           | 900 – 1000                                           |
| BCzPh-mimi:B3PyMPM | $2.67 \times 10^{-10}$                                          | 950 – 1050                                           |

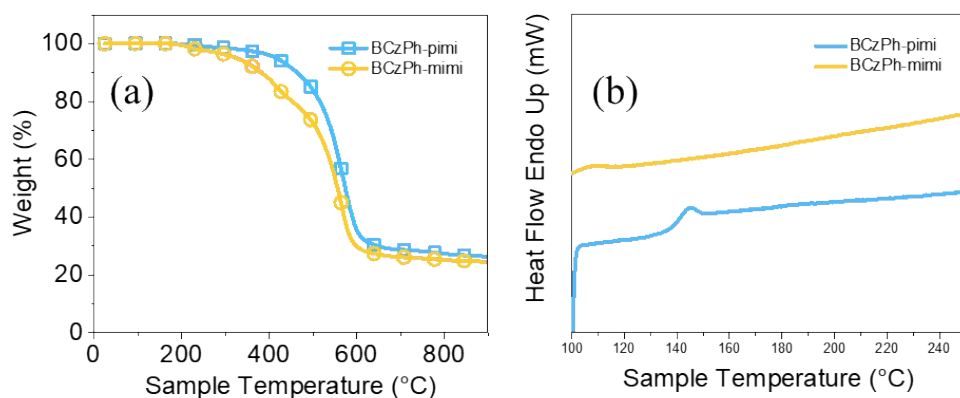

**Figure S1.** (a) TGA and (b) DSC curves of BCzPh-pimi and BCzPh-mimi.

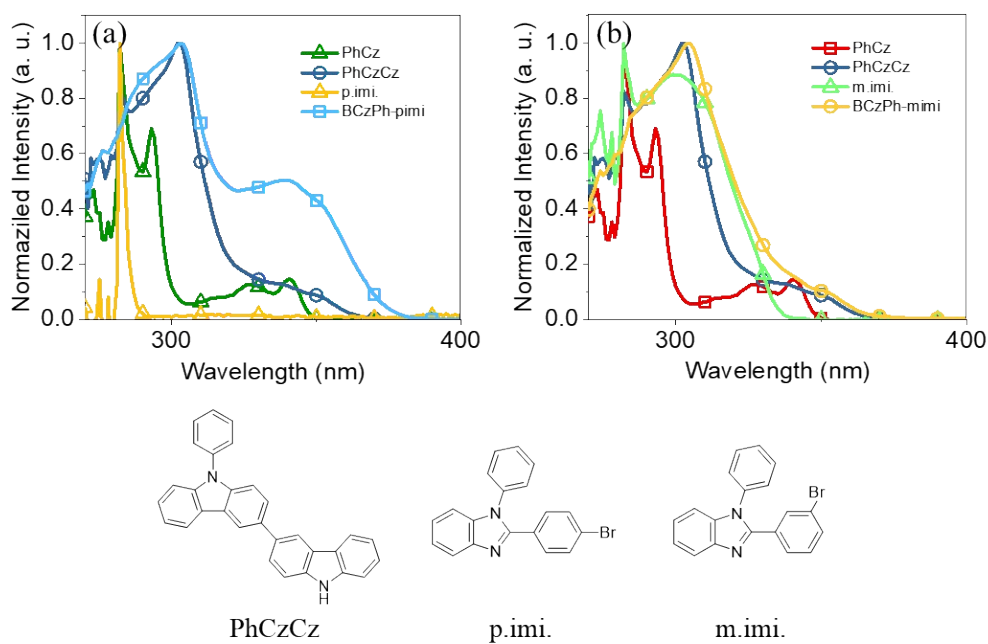

**Figure S2.** UV-Vis spectra and molecular structure of each moiety of (a) BCzPh-pimi and (c) BCzPh-mimi in toluene.

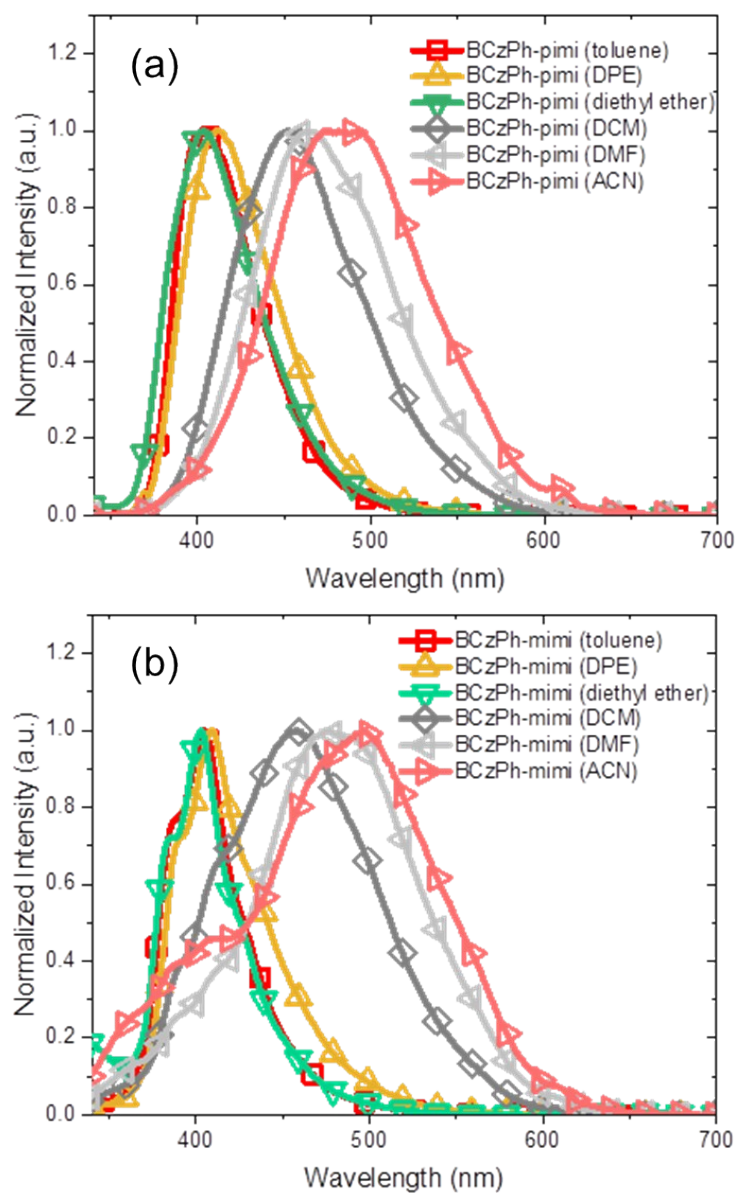

**Figure S3.** Fluorescence spectra of BCzPh-pimi, BCzPh-mimi in toluene and dichloromethane (DCM) at  $1 \times 10^{-5}$  M.

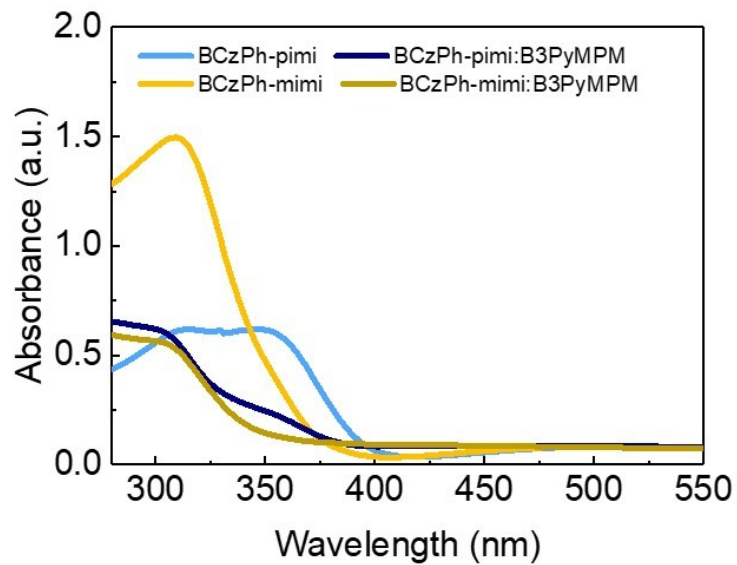

**Figure S4.** UV-Vis spectra of the bare films of BCzPh-pimi, BCzPh-mimi and their blended films with B3PyMPM measured in room temperature.

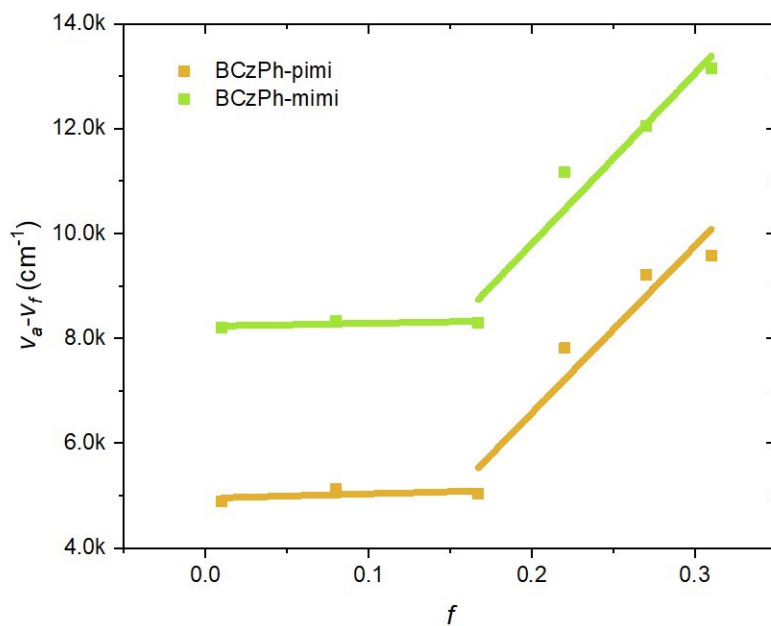

**Figure S5.** The fitted linear correlation of the Stokes shift against the different solvent polarizability for BCzPh-pimi and BCzPh-mimi.

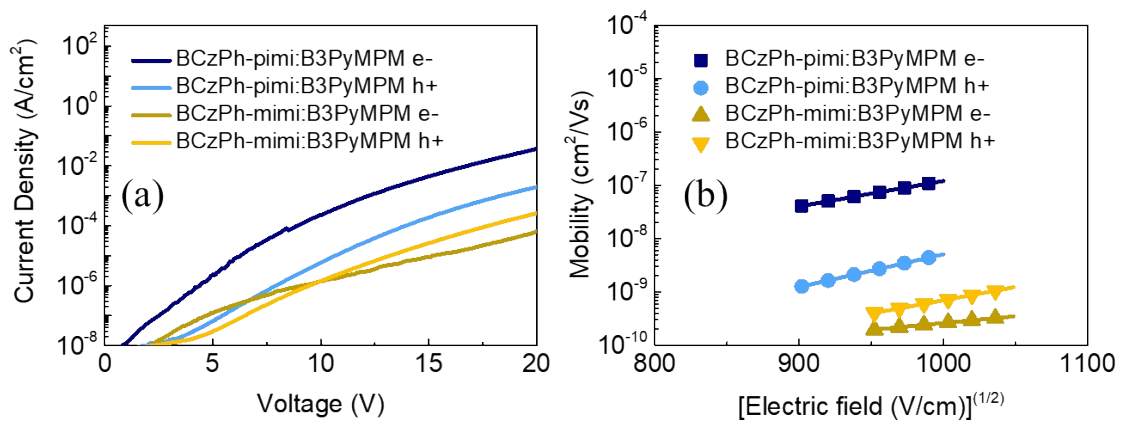

**Figure S6.** The mobility measurement for the blended films of BCzPh-pimi:B3PyMPM and BCzPh-mimi:B3PyMPM. (a) Current density of hole and electron only device. (b) Hole and electron only device mobility.



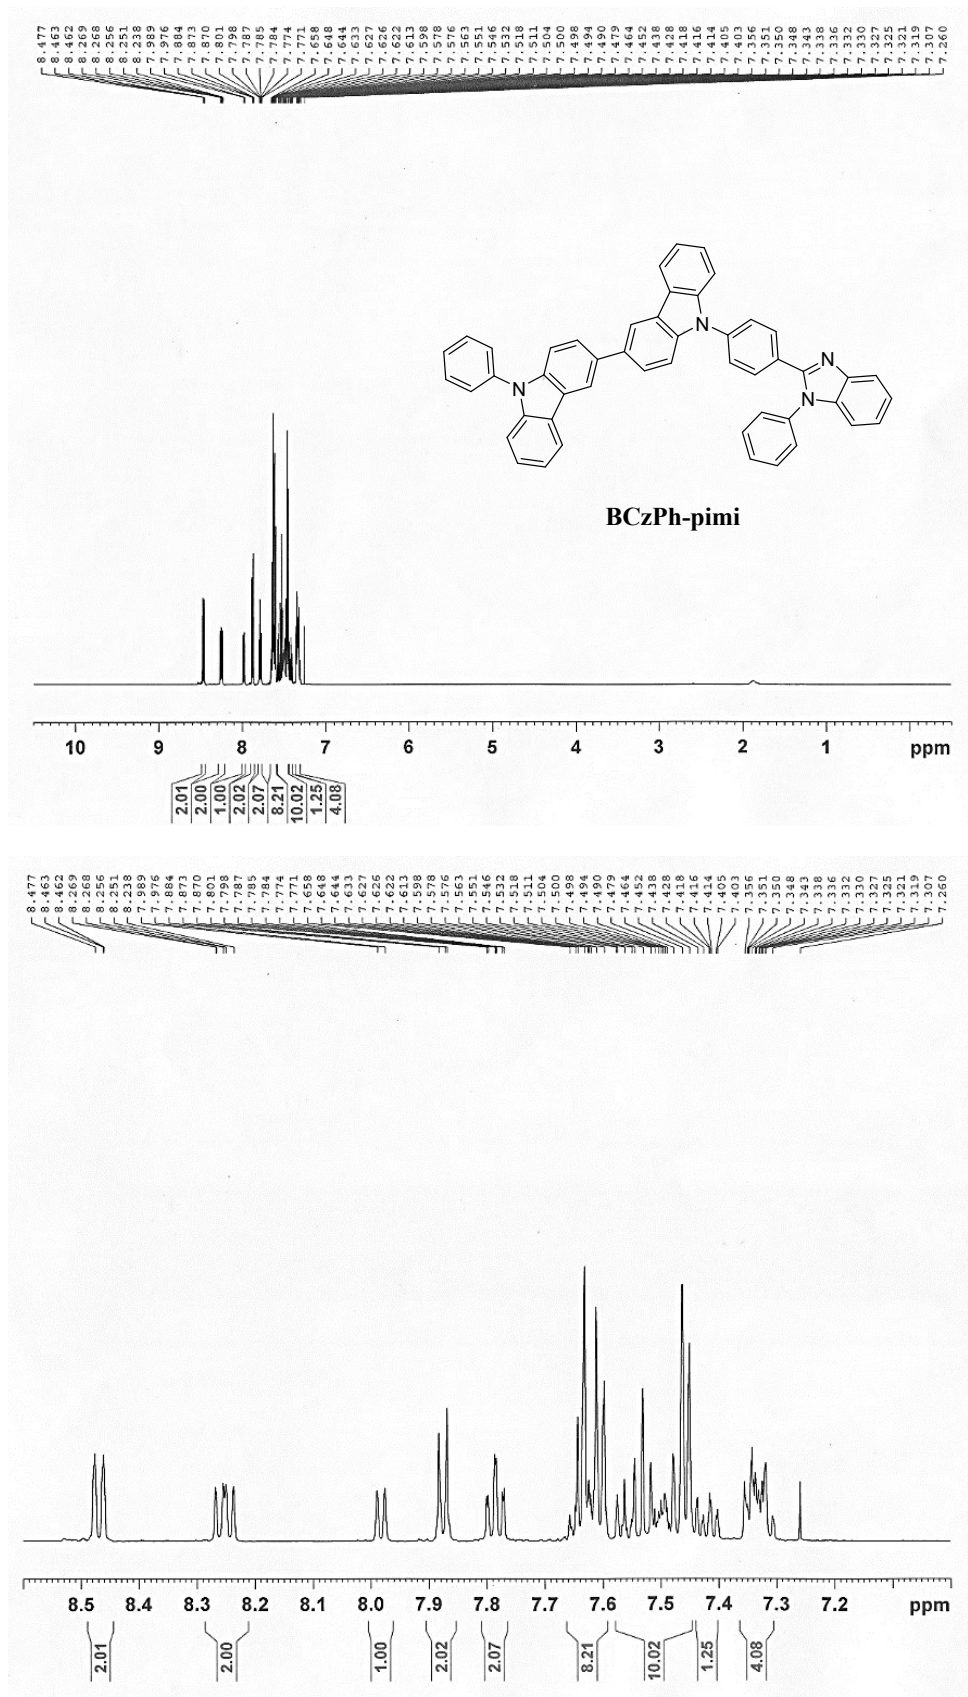

Figure S7.  $^1\text{H}$  NMR spectrum of BCzPh-pimi in  $\text{CDCl}_3$ .

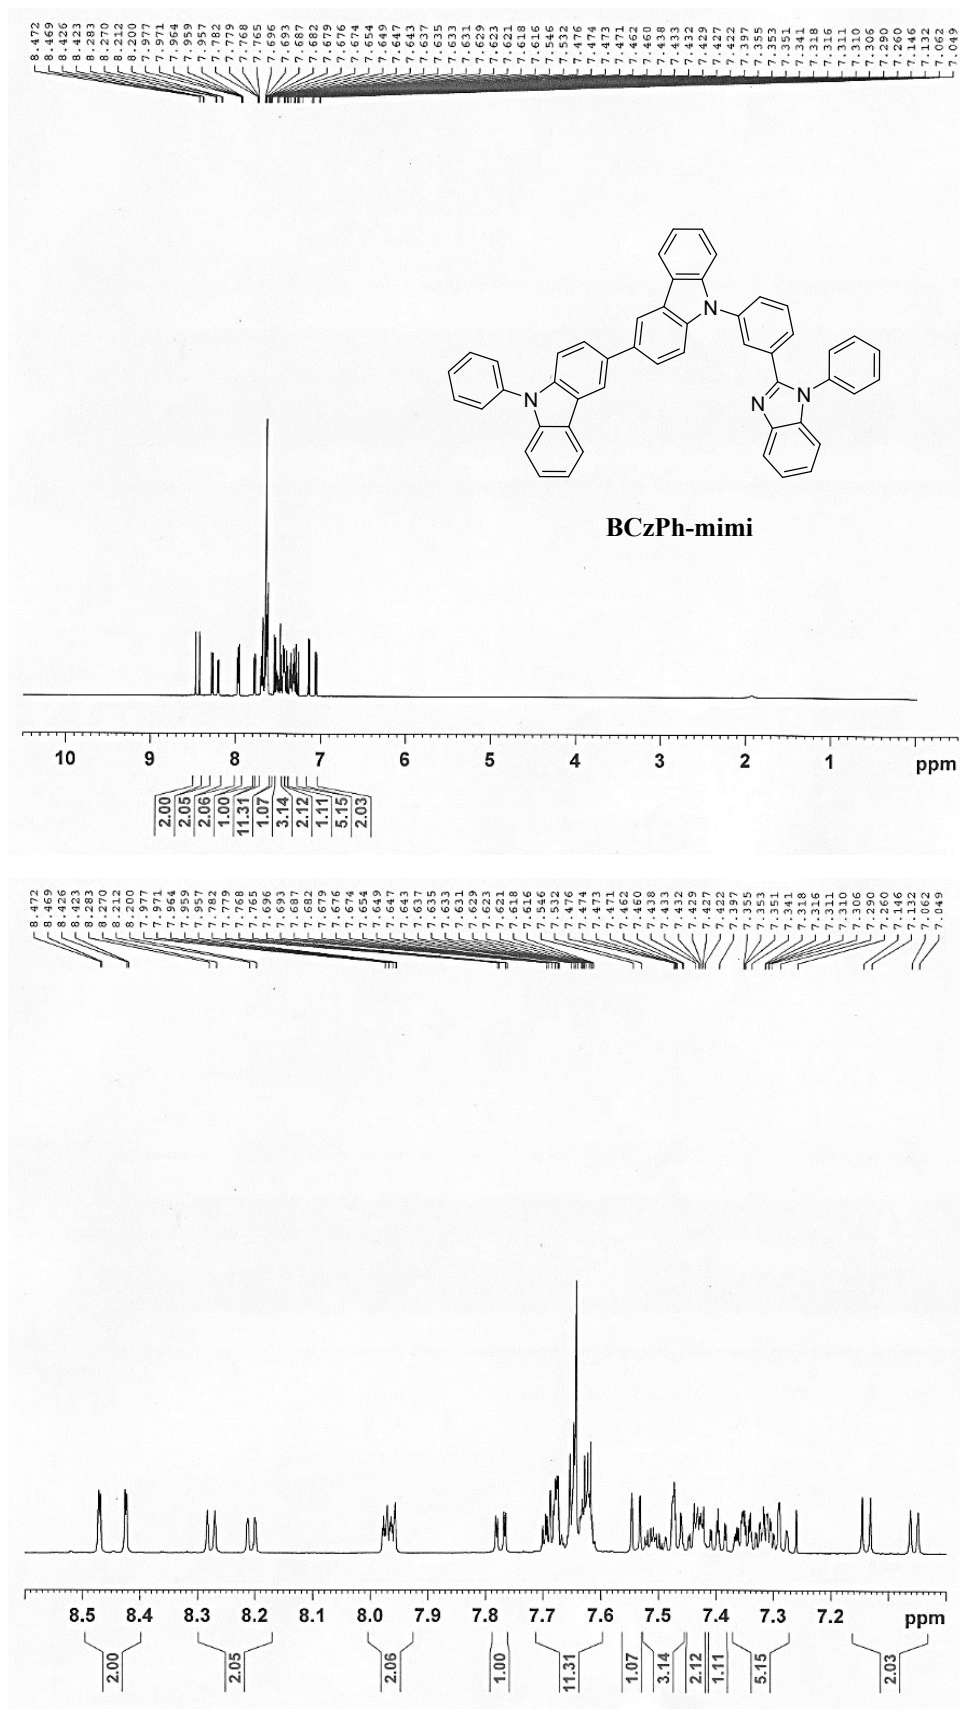

**Figure S8.**  $^1\text{H}$  NMR spectrum of BCzPh-mimi in  $\text{CDCl}_3$ .

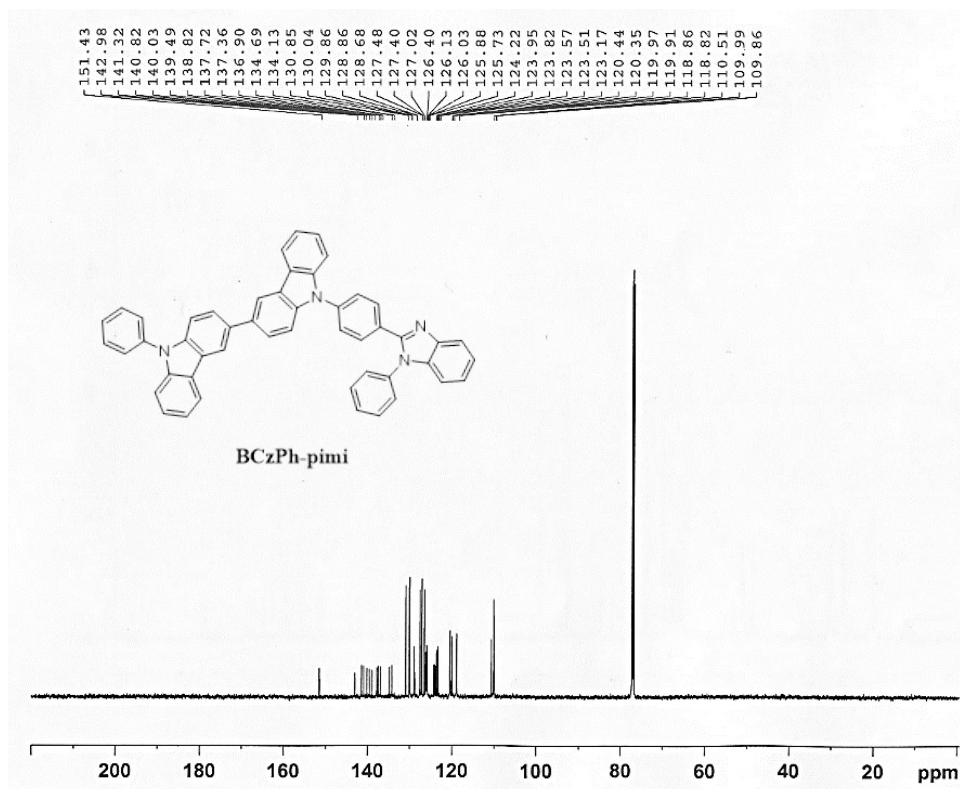

**Figure S9.** <sup>13</sup>C NMR spectrum of BCzPh-pimi in CDCl<sub>3</sub>.

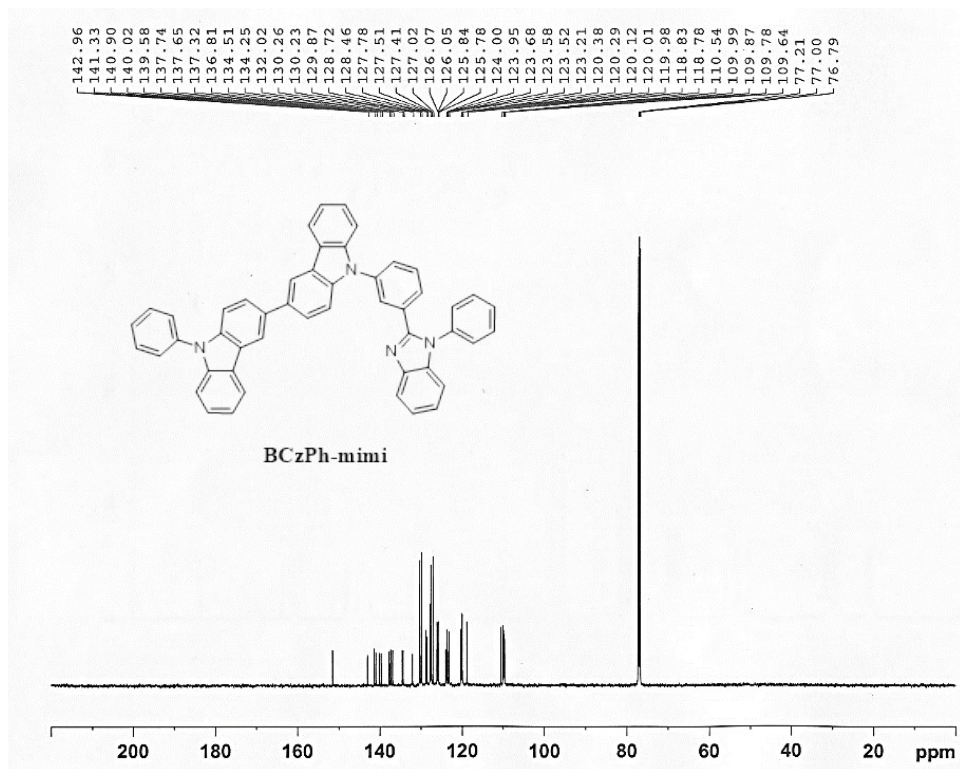

**Figure S10.** <sup>13</sup>C NMR spectrum of isolated compound BCzPh-mimi in CDCl<sub>3</sub>.

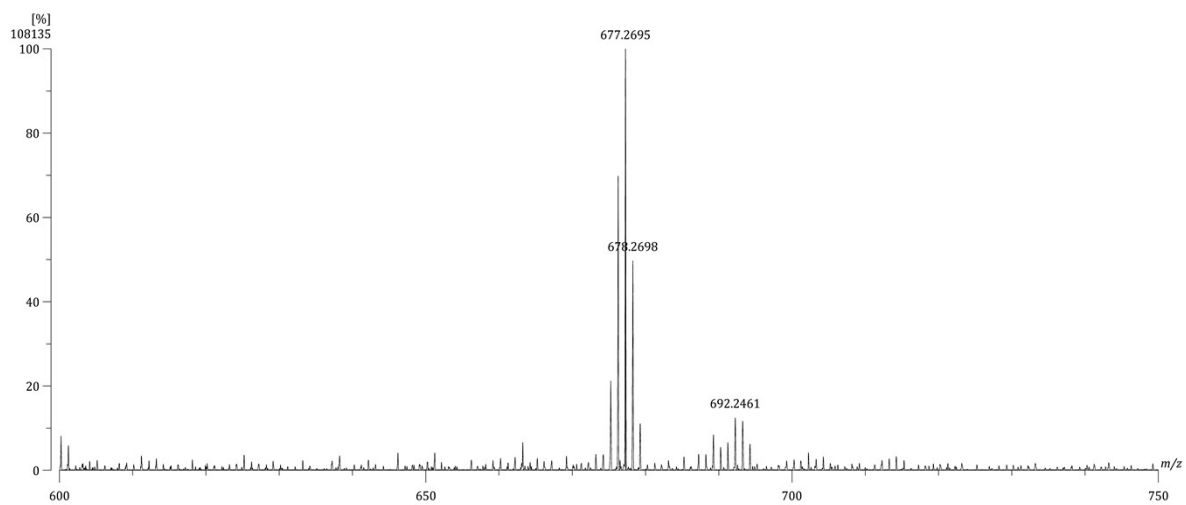

**Figure S11.** Mass spectrum of BCzPh-pimi.

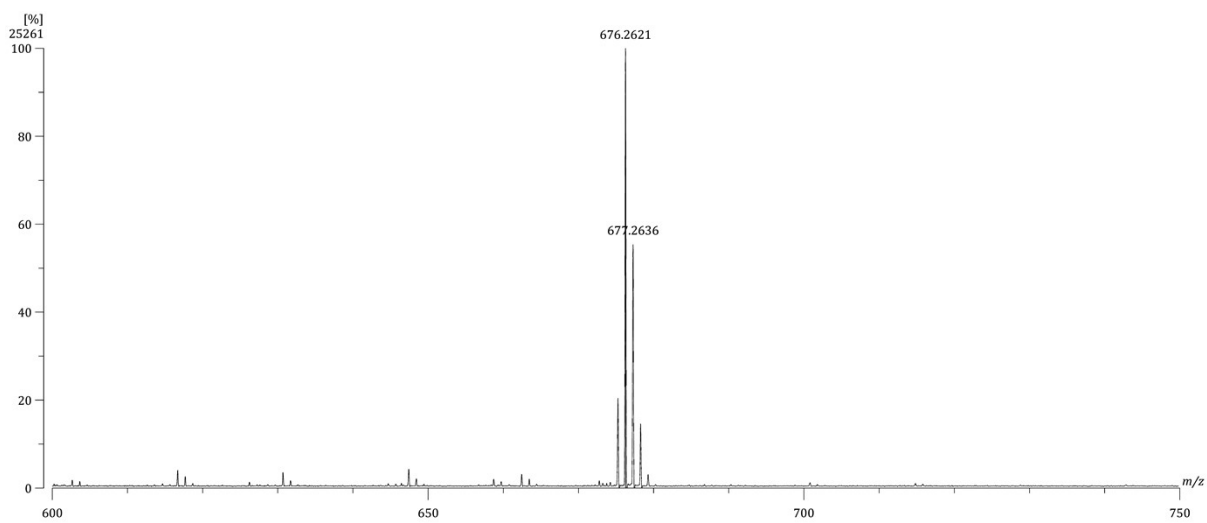

**Figure S12.** Mass spectrum of BCzPh-mimi.
